# Supplementary material for: Modeling Chemical Interaction Profiles: II. Molecular Docking, Spectral Data-Activity Relationship, and Structure-Activity Relationship Models for Potent and Weak Inhibitors of Cytochrome P450 CYP3A4 Isozyme
Source: Molecules. 2012 Mar 15;17(3):3407–60. doi: 10.3390/molecules17033407 (PMC6268819; doi:10.3390/molecules17033407)
Supplement: Supplementary file 1 [file molecules-17-03407-s001.pdf]

## Supplementary Material

### Modeling Chemical Interaction Profiles: II. Molecular Docking, Spectral Data-Activity Relationship, and Structure-Activity Relationship Models for Potent and Weak Inhibitors of Cytochrome P450 CYP3A4 Isozyme

**Table 1.** Testing set of CYP3A4 inhibitors (120 compounds).

| Compound           | Compound                 | Compound         | Compound     |
|--------------------|--------------------------|------------------|--------------|
| Almotriptan        | Domperidone              | Paclitaxel       | Tioconazole  |
| Ambroxol           | Ebrotidine               | Pantoprazole     | Trimethoprim |
| Amitriptyline      | Econazole                | Papaverine       | Troglitazone |
| Aranidipine        | Efonidipine              | Parathion        | Valdecoxib   |
| Astemizole         | Eplerenone               | Perphenazine     | Valspodar    |
| Avasimibe          | Ethinylestradiol         | Pilsicainide     | Vindesine    |
| Azamulin           | Etoricoxib               | Pioglitazone     | Zaltoprofen  |
| Barnidipine        | Famotidine               | Piroxicam        | Zileuton     |
| Benidipine         | Fluphenazine             | Prednisone       | Zolpidem     |
| Bifonazole         | Flurithromycin           | Proadifen        |              |
| Buprenorphine      | Flutamide                | Quercetin        |              |
| Calcium folinate   | Gallopamil               | Quinelorane      |              |
| Carbamazepine      | Gemfibrozil              | Raloxifene       |              |
| Carvedilol         | Gestodene                | Ranitidine       |              |
| Cerivastatin       | Glipizide                | Reboxetine       |              |
| Cetirizine         | Grepafloxacin            | Remacemide       |              |
| Chlormadinone      | Homochlorcyclizine       | Reserpine        |              |
| Chloroquine        | Ipriflavone              | Rokitamycin      |              |
| Chlorpromazine     | Irinotecan               | Rosiglitazone    |              |
| Chlorpyrifos       | Josamycin                | Roxithromycin    |              |
| Ciclosporin        | Lercanidipine            | Salbutamol       |              |
| Clindamycin        | Lilopristone             | Seratrovast      |              |
| Colchicine         | Lopinavir                | Sertindole       |              |
| Corticosterone     | m-Chlorophenylpiperazine | Simvastatin      |              |
| Cortisol           | Malathion                | Spironolactone   |              |
| Coumarin           | Mequitazine              | Stiripentol      |              |
| Dalfopristin       | Metoclopramide           | Sulfamethizole   |              |
| Daunorubicin       | Metyrapone               | Sulfamethoxazole |              |
| Delapril           | Mibefradil               | Sulfaphenazole   |              |
| Desloratadine      | Midecamycin              | Sulfinpyrazone   |              |
| Dexamethasone      | Mizolastine              | Sulpiride        |              |
| Digoxin            | Nilvadipine              | Tazanolast       |              |
| Dihydralazine      | Nimodipine               | Tecastemizole    |              |
| Dimethyl sulfoxide | Norfluoxetine            | Tegaserod        |              |
| Dirithromycin      | Oltipraz                 | Terfenadine      |              |
| Disulfamide        | Onapristone              | Theophylline     |              |
| Ditiocarb sodium   | Oxiconazole              | Timoprazole      |              |

**Table 2.** Categorization of the 241 CYP3A4 inhibitors of Yap and Chen [33] by potency of CYP isozyme inhibition.

| Drug Name        | Source                        | Inhibitor of CYP isoform- |          |      |      |          |          |          |      |          | Inhibitor of other protein | Group        |
|------------------|-------------------------------|---------------------------|----------|------|------|----------|----------|----------|------|----------|----------------------------|--------------|
|                  |                               | -1A2                      | -2A6     | -2B6 | -2C8 | -2C9     | -2C19    | -2D6     | -2E1 | -3A4     |                            |              |
| acetazolamide    | Merck                         |                           |          |      |      |          |          |          |      | weak     |                            | Training set |
| amiodarone       | Merck                         | weak                      | moderate | weak |      | moderate | weak     | moderate |      | moderate | P-glycoprotein             | Training set |
| amlodipine       | Merck                         | moderate                  | weak     | weak | weak | weak     |          | weak     |      | weak     |                            | Training set |
| amprenavir       | GreenRX pharmacy <sup>1</sup> |                           |          |      |      |          | weak     |          |      | strong   |                            | Training set |
| anastrozole      | Merck                         | weak                      |          |      | weak | weak     |          |          |      | weak     |                            | Training set |
| aprepitant       | Merck                         |                           |          |      |      | weak     | weak     |          |      | moderate |                            | Training set |
| atazanavir       | Merck                         | weak                      |          |      | weak | weak     |          |          |      | strong   | UGT1A1                     | Training set |
| atorvastatin     | Merck                         |                           |          |      |      |          |          |          |      | weak     | P-glycoprotein             | Training set |
| azelastine       | Merck                         |                           |          | weak |      | weak     | weak     | weak     |      | weak     |                            | Training set |
| azithromycin     | Merck                         |                           |          |      |      |          |          |          |      | weak     |                            | Training set |
| betamethasone    | Merck                         |                           |          |      |      |          |          |          |      | weak     |                            | Training set |
| bromocriptine    | Merck                         | weak                      |          |      |      |          |          |          |      | weak     |                            | Training set |
| chloramphenicol  | Merck                         |                           |          |      |      | weak     |          |          |      | weak     |                            | Training set |
| chlorzoxazone    | Merck                         |                           |          |      |      |          |          |          | weak | weak     |                            | Training set |
| cimetidine       | Merck                         | moderate                  |          |      |      | weak     | moderate | moderate | weak | moderate |                            | Training set |
| ciprofloxacin    | Merck                         | strong                    |          |      |      |          |          |          |      | weak     |                            | Training set |
| cisapride        | Merck                         |                           |          |      |      |          |          | weak     |      | weak     |                            | Training set |
| clarithromycin   | Merck                         | weak                      |          |      |      |          |          |          |      | strong   | P-glycoprotein             | Training set |
| clemastine       | Merck                         |                           |          |      |      |          |          | weak     |      | weak     |                            | Training set |
| clofazimine      | AIDS journal <sup>2</sup>     |                           |          |      |      |          |          |          |      | weak     |                            | Training set |
| clotrimazole     | Merck                         | weak                      | weak     | weak | weak | weak     | weak     | weak     | weak | moderate |                            | Training set |
| clozapine        | Merck                         | weak                      |          |      |      | weak     | weak     | moderate | weak | weak     |                            | Training set |
| cocaine          | Merck                         |                           |          |      |      |          |          | strong   |      | weak     |                            | Training set |
| cyclophosphamide | Merck                         |                           |          |      |      |          |          |          |      | weak     |                            | Training set |
| danazol          | Merck                         |                           |          |      |      |          |          |          |      | weak     |                            | Training set |
| delavirdine      | Merck                         | weak                      |          |      |      | strong   | strong   | strong   |      | strong   |                            | Training set |

| Drug Name          | Source                            | Inhibitor of CYP isoform- |      |          |          |          |          |          |      |          | Inhibitor of other protein | Group        |
|--------------------|-----------------------------------|---------------------------|------|----------|----------|----------|----------|----------|------|----------|----------------------------|--------------|
|                    |                                   | -1A2                      | -2A6 | -2B6     | -2C8     | -2C9     | -2C19    | -2D6     | -2E1 | -3A4     |                            |              |
| dexmedetomidine    | Merck                             | weak                      |      |          |          | weak     |          | strong   |      | weak     |                            | Training set |
| dextropropoxyphene | Merck                             |                           |      |          |          | weak     |          | weak     |      | weak     |                            | Training set |
| diazepam           | Merck                             |                           |      |          |          |          | weak     |          |      | weak     |                            | Training set |
| diclofenac         | Medical report <sup>3</sup>       | moderate                  |      |          | weak     | weak     |          |          | weak | strong   |                            | Training set |
| dihydroergotamine  | Merck                             |                           |      |          |          |          |          |          |      | weak     |                            | Training set |
| diltiazem          | Merck                             |                           |      |          |          | weak     |          | weak     |      | moderate |                            | Training set |
| docetaxel          | Merck                             |                           |      |          |          |          |          |          |      | weak     |                            | Training set |
| doxorubicin        | Merck                             |                           |      | moderate |          |          |          | weak     |      | weak     |                            | Training set |
| doxycycline        | Merck                             |                           |      |          |          |          |          |          |      | moderate |                            | Training set |
| drospirenone       | Merck                             | weak                      |      |          |          | weak     | weak     |          |      | weak     |                            | Training set |
| efavirenz          | HIV medicine journal <sup>4</sup> |                           |      |          |          | weak     | weak     |          |      | weak     |                            | Training set |
| entacapone         | Merck                             | weak                      | weak |          |          | weak     | weak     | weak     | weak | weak     |                            | Training set |
| ergotamine         | Merck                             |                           |      |          |          |          |          |          |      | weak     |                            | Training set |
| erythromycin       | Merck                             | weak                      |      |          |          |          |          |          |      | moderate | P-glycoprotein             | Training set |
| etoposide          | Merck                             |                           |      |          |          | weak     |          |          |      | weak     |                            | Training set |
| felodipine         | Merck                             |                           |      |          | moderate | weak     |          | weak     |      | weak     |                            | Training set |
| fentanyl           | Merck                             |                           |      |          |          |          |          |          |      | weak     |                            | Training set |
| fluconazole        | Merck                             | weak                      |      |          |          | strong   | strong   |          |      | moderate |                            | Training set |
| fluoxetine         | Merck                             | moderate                  |      | weak     |          | weak     | moderate | strong   |      | weak     |                            | Training set |
| fluvastatin        | Merck                             | weak                      |      |          | weak     | moderate |          | weak     |      | weak     |                            | Training set |
| fluvoxamine        | Merck                             | strong                    |      | weak     |          | weak     | strong   | weak     |      | weak     |                            | Training set |
| glibenclamide      | Merck                             |                           |      |          | weak     |          |          |          |      | weak     |                            | Training set |
| haloperidol        | Merck                             |                           |      |          |          |          |          | moderate |      | moderate |                            | Training set |
| hydralazine        | Merck                             |                           |      |          |          |          |          |          |      | weak     |                            | Training set |
| ifosfamide         | Merck                             |                           |      |          |          |          |          |          |      | weak     |                            | Training set |
| imatinib           | Merck                             |                           |      |          |          | weak     |          | moderate |      | strong   | ABCG2                      | Training set |
| indinavir          | Merck                             |                           |      |          |          | weak     | weak     | weak     |      | strong   |                            | Training set |

| Drug Name          | Source                            | Inhibitor of CYP isoform- |          |        |          |          |          |          |          |          | Inhibitor of other protein | Group        |
|--------------------|-----------------------------------|---------------------------|----------|--------|----------|----------|----------|----------|----------|----------|----------------------------|--------------|
|                    |                                   | -1A2                      | -2A6     | -2B6   | -2C8     | -2C9     | -2C19    | -2D6     | -2E1     | -3A4     |                            |              |
| irbesartan         | Merck                             |                           |          |        | moderate | moderate |          | weak     |          | weak     |                            | Training set |
| isoniazid          | Merck                             | weak                      | moderate |        |          | weak     | strong   | moderate | moderate | strong   |                            | Training set |
| itraconazole       | Merck                             |                           |          |        |          |          |          |          |          | strong   | P-glycoprotein             | Training set |
| ketoconazole       | Merck                             | strong                    | moderate | weak   | weak     | strong   | moderate | moderate |          | strong   | P-glycoprotein             | Training set |
| lansoprazole       | Merck                             |                           |          |        |          | weak     | moderate | weak     |          | weak     |                            | Training set |
| lomustine          | Merck                             |                           |          |        |          |          |          | weak     |          | weak     |                            | Training set |
| loratadine         | Merck                             |                           |          |        | weak     |          | moderate | weak     |          | weak     |                            | Training set |
| losartan           | Merck                             | weak                      |          |        | moderate | moderate | weak     |          |          | weak     |                            | Training set |
| mefloquine         | Merck                             |                           |          |        |          |          |          | weak     |          | weak     | P-glycoprotein             | Training set |
| methadone          | Merck                             |                           |          |        |          |          |          | moderate |          | weak     |                            | Training set |
| methoxsalen        | Merck                             | strong                    | strong   |        |          | weak     | weak     | weak     | weak     | weak     |                            | Training set |
| methylprednisolone | Merck                             |                           |          |        | weak     |          |          |          |          | weak     |                            | Training set |
| metronidazole      | Merck                             |                           |          |        |          | weak     |          |          |          | moderate |                            | Training set |
| miconazole         | Merck                             | moderate                  | strong   | strong |          | strong   | strong   | strong   | moderate | strong   |                            | Training set |
| midazolam          | Merck                             |                           |          |        | weak     | weak     |          |          |          | weak     |                            | Training set |
| mifepristone       | Merck                             |                           |          |        |          |          |          | weak     |          | weak     |                            | Training set |
| mirtazapine        | Merck                             | weak                      |          |        |          |          |          |          |          | weak     |                            | Training set |
| mitoxantrone       | Merck                             |                           |          |        |          |          |          |          |          | weak     |                            | Training set |
| nefazodone         | Merck                             | weak                      |          | weak   | weak     |          |          | weak     |          | strong   |                            | Training set |
| nelfinavir         | Merck                             | weak                      |          | weak   |          | weak     | weak     | weak     |          | strong   | P-glycoprotein             | Training set |
| nevirapine         | Merck                             | weak                      |          |        |          |          |          | weak     |          | weak     |                            | Training set |
| nicardipine        | Merck                             |                           |          |        |          | strong   | moderate | moderate |          | strong   | P-glycoprotein             | Training set |
| nifedipine         | Merck                             | moderate                  |          |        |          | weak     |          | weak     |          | weak     |                            | Training set |
| nisoldipine        | Merck                             | weak                      |          |        |          |          |          |          |          | weak     |                            | Training set |
| nitrendipine       | Eur J Clin Pharmacol <sup>5</sup> |                           |          |        |          |          |          |          |          | weak     |                            | Training set |
| norfloxacin        | Merck                             | strong                    |          |        |          |          |          |          |          | moderate |                            | Training set |
| olanzapine         | Merck                             | weak                      |          |        |          | weak     | weak     | weak     |          | weak     |                            | Training set |
| omeprazole         | Merck                             | weak                      |          |        |          | moderate | moderate | weak     |          | weak     |                            | Training set |

| Drug Name     | Source                        | Inhibitor of CYP isoform- |      |          |          |          |          |          |      |          | Inhibitor of other protein | Group        |
|---------------|-------------------------------|---------------------------|------|----------|----------|----------|----------|----------|------|----------|----------------------------|--------------|
|               |                               | -1A2                      | -2A6 | -2B6     | -2C8     | -2C9     | -2C19    | -2D6     | -2E1 | -3A4     |                            |              |
| orphenadrine  | Merck                         | weak                      | weak | weak     |          | weak     | weak     | weak     | weak | weak     |                            | Training set |
| oxybutynin    | Merck                         |                           |      |          | weak     |          |          | weak     |      | weak     |                            | Training set |
| paracetamol   | Merck                         |                           |      |          |          |          |          |          |      | weak     |                            | Training set |
| paroxetine    | Merck                         | weak                      |      | moderate |          | weak     | weak     | strong   |      | weak     |                            | Training set |
| pergolide     | Merck*                        |                           |      |          |          |          |          | strong   |      | weak     |                            | Training set |
| phencyclidine | FDA website <sup>6</sup>      |                           |      |          |          |          |          |          |      | weak     |                            | Training set |
| pilocarpine   | Merck                         |                           | weak |          |          |          |          |          | weak | weak     |                            | Training set |
| pimozide      | Merck                         |                           |      |          |          |          | weak     | weak     | weak | weak     |                            | Training set |
| pravastatin   | Merck                         |                           |      |          |          | weak     |          | weak     |      | weak     |                            | Training set |
| prednisolone  | Merck                         |                           |      |          |          |          |          |          |      | weak     |                            | Training set |
| primaquine    | Merck                         | strong                    |      |          |          |          |          | weak     |      | weak     |                            | Training set |
| propofol      | GreenRX pharmacy <sup>7</sup> | moderate                  |      |          | weak     | weak     | moderate | weak     | weak | strong   |                            | Training set |
| quinine       | Merck                         |                           |      |          | moderate | moderate |          | moderate |      | weak     |                            | Training set |
| quinupristin  | Merck                         |                           |      |          |          |          |          |          |      | weak     |                            | Training set |
| rabeprazole   | Merck                         |                           |      |          | moderate |          | moderate | weak     |      | weak     |                            | Training set |
| risperidone   | Merck                         |                           |      |          |          |          |          | weak     |      | weak     |                            | Training set |
| ritonavir     | Merck                         |                           |      |          | strong   | weak     | weak     | strong   | weak | strong   | P-glycoprotein             | Training set |
| saquinavir    | Merck                         |                           |      |          |          | weak     | weak     | weak     |      | moderate | P-glycoprotein             | Training set |
| selegiline    | Merck                         | weak                      | weak |          |          | weak     | weak     | weak     | weak | weak     |                            | Training set |
| sertraline    | Merck                         | weak                      |      | moderate | weak     | weak     | moderate | moderate |      | moderate |                            | Training set |
| sildenafil    | Merck                         | weak                      |      |          |          | weak     | weak     | weak     | weak | weak     |                            | Training set |
| sirolimus     | Merck                         |                           |      |          |          |          |          |          |      | weak     |                            | Training set |
| sulconazole   | Merck                         | weak                      | weak |          |          | weak     | weak     | weak     | weak | weak     |                            | Training set |
| tacrolimus    | Merck                         |                           |      |          |          |          |          |          |      | weak     | P-glycoprotein             | Training set |
| tamoxifen     | Merck                         |                           |      | weak     | moderate | weak     |          |          |      | weak     | p-glycoprotein             | Training set |
| teniposide    | Merck                         |                           |      |          |          | weak     |          |          |      | weak     |                            | Training set |
| testosterone  | Merck                         |                           |      |          |          |          |          |          |      | weak     |                            | Training set |
| tetracycline  | Merck                         |                           |      |          |          |          |          |          |      | moderate |                            | Training set |

[illegible]

[illegible]

| Drug Name        | Source                        | Substrate of CYP isoform- |       |       |                    |       |       |       |       |       |       | Substrate of other protein | Group        |
|------------------|-------------------------------|---------------------------|-------|-------|--------------------|-------|-------|-------|-------|-------|-------|----------------------------|--------------|
|                  |                               | -1A2                      | -2A6  | -2B6  | -2C8               | -2C9  | -2C18 | -2C19 | -2D6  | -2E1  | -3A4  |                            |              |
| acetazolamide    | Merck                         |                           |       |       |                    |       |       |       |       |       |       |                            | Training set |
| amiodarone       | Merck                         | minor                     |       |       | major at low conc. |       |       | minor | minor |       | major | P-glycoprotein             | Training set |
| amlodipine       | Merck                         |                           |       |       |                    |       |       |       |       |       | major |                            | Training set |
| amprenavir       | GreenRX pharmacy <sup>1</sup> |                           |       |       | minor              | minor |       |       |       |       | major |                            | Training set |
| anastrozole      | Merck                         |                           |       |       |                    |       |       |       |       |       |       |                            | Training set |
| aprepitant       | Merck                         | minor                     |       |       |                    |       |       | minor |       |       | major |                            | Training set |
| atazanavir       | Merck                         |                           |       |       |                    |       |       |       |       |       | major |                            | Training set |
| atorvastatin     | Merck                         |                           |       |       |                    |       |       |       |       |       | major | P-glycoprotein             | Training set |
| azelastine       | Merck                         | minor                     |       |       |                    |       |       | minor | minor |       | minor |                            | Training set |
| azithromycin     | Merck                         |                           |       |       |                    |       |       |       |       |       | minor |                            | Training set |
| betamethasone    | Merck                         |                           |       |       |                    |       |       |       |       |       |       |                            | Training set |
| bromocriptine    | Merck                         |                           |       |       |                    |       |       |       |       |       | major |                            | Training set |
| chloramphenicol  | Merck                         |                           |       |       |                    |       |       |       |       |       |       |                            | Training set |
| chlorzoxazone    | Merck                         | minor                     | minor |       |                    |       |       |       | minor | major | minor |                            | Training set |
| cimetidine       | Merck                         |                           |       |       |                    |       |       |       |       |       |       | P-glycoprotein             | Training set |
| ciprofloxacin    | Merck                         |                           |       |       |                    |       |       |       |       |       |       | P-glycoprotein             | Training set |
| cisapride        | Merck                         | minor                     | minor | minor |                    | minor |       | minor |       |       | major |                            | Training set |
| clarithromycin   | Merck                         |                           |       |       |                    |       |       |       |       |       | major |                            | Training set |
| clemastine       | Merck                         |                           |       |       |                    |       |       |       |       |       |       |                            | Training set |
| clofazimine      | AIDS journal <sup>2</sup>     |                           |       |       |                    |       |       |       |       |       |       |                            | Training set |
| clotrimazole     | Merck                         |                           |       |       |                    |       |       |       |       |       |       |                            | Training set |
| clozapine        | Merck                         | major                     | minor |       |                    | minor |       | minor | minor |       | minor |                            | Training set |
| cocaine          | Merck                         |                           |       |       |                    |       |       |       |       |       | major |                            | Training set |
| cyclophosphamide | Merck                         |                           | minor | major |                    | minor |       | minor |       |       | minor |                            | Training set |
| danazol          | Merck                         |                           |       |       |                    |       |       |       |       |       |       |                            | Training set |
| delavirdine      | Merck                         |                           |       |       |                    |       |       |       | minor |       | major |                            | Training set |

| Drug Name          | Source | Substrate of CYP isoform- |       |       |       |       |       |       |       |       |       | Substrate of other protein | Group        |
|--------------------|--------|---------------------------|-------|-------|-------|-------|-------|-------|-------|-------|-------|----------------------------|--------------|
|                    |        | -1A2                      | -2A6  | -2B6  | -2C8  | -2C9  | -2C18 | -2C19 | -2D6  | -2E1  | -3A4  |                            |              |
| dexmedetomidine    | Merck  |                           | major |       |       |       |       |       |       |       |       |                            | Training set |
| dextropropoxyphene | Merck  |                           |       |       |       |       |       |       |       |       | major |                            | Training set |
| diazepam           | Merck  | minor                     |       | minor |       | minor |       | major |       |       | major |                            | Training set |
| diclofenac         | Merck  | minor                     |       | minor | minor | minor |       | minor | minor |       | minor |                            | Training set |
| dihydroergotamine  | Merck  |                           |       |       |       |       |       |       |       |       | major |                            | Training set |
| diltiazem          | Merck  |                           |       |       |       | minor |       |       | minor |       | major | P-glycoprotein             | Training set |
| docetaxel          | Merck  |                           |       |       |       |       |       |       |       |       | major | P-glycoprotein             | Training set |
| doxorubicin        | Merck  |                           |       |       |       |       |       |       | major |       | major | P-glycoprotein             | Training set |
| doxycycline        | Merck  |                           |       |       |       |       |       |       |       |       |       |                            | Training set |
| drospirenone       | Merck  |                           |       |       |       |       |       |       |       |       | minor |                            | Training set |
| efavirenz          | Merck  |                           |       | major |       |       |       |       |       |       | major |                            | Training set |
| entacapone         | Merck  |                           |       |       |       |       |       |       |       |       |       |                            | Training set |
| ergotamine         | Merck  |                           |       |       |       |       |       |       |       |       | major |                            | Training set |
| erythromycin       | Merck  |                           |       | minor |       |       |       |       |       |       | major | P-glycoprotein             | Training set |
| etoposide          | Merck  | minor                     |       |       |       |       |       |       |       | minor | major | P-glycoprotein             | Training set |
| felodipine         | Merck  |                           |       |       |       |       |       |       |       |       | major |                            | Training set |
| fentanyl           | Merck  |                           |       |       |       |       |       |       |       |       | major |                            | Training set |
| fluconazole        | Merck  |                           |       |       |       |       |       |       |       |       |       |                            | Training set |
| fluoxetine         | Merck  | minor                     |       | minor |       | major |       | minor | major | minor | minor |                            | Training set |
| fluvastatin        | Merck  |                           |       |       | minor | major |       |       | minor |       | minor | SLCO1B1                    | Training set |
| fluvoxamine        | Merck  | major                     |       |       |       |       |       |       | major |       |       |                            | Training set |
| glibenclamide      | Merck  |                           |       |       |       | major |       |       |       |       | minor |                            | Training set |
| haloperidol        | Merck  | minor                     |       |       |       |       |       |       | major |       | major |                            | Training set |
| hydralazine        | Merck  |                           |       |       |       |       |       |       |       |       |       |                            | Training set |
| ifosfamide         | Merck  |                           | major | minor | minor | minor |       | major |       |       | major |                            | Training set |
| imatinib           | Merck  | minor                     |       |       |       | minor |       | minor | minor |       | major | P-glycoprotein             | Training set |
| indinavir          | Merck  |                           |       |       |       |       |       |       | minor |       | major | P-glycoprotein             | Training set |
| irbesartan         | Merck  |                           |       |       |       | minor |       |       |       |       |       |                            | Training set |
| isoniazid          | Merck  |                           |       |       |       |       |       |       |       | major |       |                            | Training set |

| Drug Name          | Source | Substrate of CYP isoform- |       |       |      |       |       |       |       |       |       | Substrate of other protein | Group        |
|--------------------|--------|---------------------------|-------|-------|------|-------|-------|-------|-------|-------|-------|----------------------------|--------------|
|                    |        | -1A2                      | -2A6  | -2B6  | -2C8 | -2C9  | -2C18 | -2C19 | -2D6  | -2E1  | -3A4  |                            |              |
| itraconazole       | Merck  |                           |       |       |      |       |       |       |       |       | major |                            | Training set |
| ketoconazole       | Merck  |                           |       |       |      |       |       |       |       |       | major |                            | Training set |
| lansoprazole       | Merck  |                           |       |       |      | minor |       | major |       |       | major |                            | Training set |
| lomustine          | Merck  |                           |       |       |      |       |       |       | sub*  |       |       |                            | Training set |
| loratadine         | Merck  |                           |       |       |      |       |       |       | minor |       | minor | P-glycoprotein             | Training set |
| losartan           | Merck  |                           |       |       |      | major |       |       |       |       | major |                            | Training set |
| mefloquine         | Merck  |                           |       |       |      |       |       |       |       |       | major |                            | Training set |
| methadone          | Merck  |                           |       | major |      | minor |       | minor | minor |       | major |                            | Training set |
| methoxsalen        | Merck  |                           | minor |       |      |       |       |       |       |       |       |                            | Training set |
| methylprednisolone | Merck  |                           |       |       |      |       |       |       |       |       | major |                            | Training set |
| metronidazole      | Merck  |                           |       |       |      |       |       |       |       |       |       |                            | Training set |
| miconazole         | Merck  |                           |       |       |      |       |       |       |       |       | major |                            | Training set |
| midazolam          | Merck  |                           |       | minor |      |       |       |       |       |       | major |                            | Training set |
| mifepristone       | Merck  |                           |       |       |      |       |       |       |       |       | minor |                            | Training set |
| mirtazapine        | Merck  | major                     |       |       |      | minor |       |       | major |       | major |                            | Training set |
| mitoxantrone       | Merck  |                           |       |       |      |       |       |       |       |       |       |                            | Training set |
| nefazodone         | Merck  |                           |       |       |      |       |       |       | major |       | major |                            | Training set |
| nelfinavir         | Merck  |                           |       |       |      | minor |       | major | minor |       | major | P-glycoprotein             | Training set |
| nevirapine         | Merck  |                           |       | minor |      |       |       |       | minor |       | major |                            | Training set |
| nicardipine        | Merck  | minor                     |       |       |      | minor |       |       | minor | minor | major | P-glycoprotein             | Training set |
| nifedipine         | Merck  |                           |       |       |      |       |       |       | minor |       | major |                            | Training set |
| nisoldipine        | Merck  |                           |       |       |      |       |       |       |       |       | major |                            | Training set |
| nitrendipine       | Merck  |                           |       |       |      |       |       |       |       |       |       |                            | Training set |
| norfloxacin        | Merck  |                           |       |       |      |       |       |       |       |       |       |                            | Training set |
| olanzapine         | Merck  | major                     |       |       |      |       |       |       | minor |       |       |                            | Training set |
| omeprazole         | Merck  |                           | minor |       |      | minor |       | major | minor |       | major |                            | Training set |
| orphenadrine       | Merck  | minor                     |       | minor |      |       |       |       | minor |       | minor |                            | Training set |
| oxybutynin         | Merck  |                           |       |       |      |       |       |       |       |       | minor |                            | Training set |
| paracetamol        | Merck  | minor                     | minor |       |      | minor |       |       | minor | minor | minor |                            | Training set |

[illegible]

| Drug Name      | Source                | Substrate of CYP isoform- |       |       |       |       |       |       |       |       |       | Substrate of other protein | Group        |
|----------------|-----------------------|---------------------------|-------|-------|-------|-------|-------|-------|-------|-------|-------|----------------------------|--------------|
|                |                       | -1A2                      | -2A6  | -2B6  | -2C8  | -2C9  | -2C18 | -2C19 | -2D6  | -2E1  | -3A4  |                            |              |
|                | document <sup>8</sup> |                           |       |       |       |       |       |       |       |       |       |                            |              |
| valproic acid  | Merck                 |                           | minor | minor |       | minor |       | minor |       | minor |       |                            | Training set |
| venlafaxine    | Merck                 |                           |       |       |       | minor |       | minor | major |       | major |                            | Training set |
| verapamil      | Merck                 | minor                     |       | minor |       | minor | minor |       |       | minor | major | P-glycoprotein             | Training set |
| vinblastine    | Merck                 |                           |       |       |       |       |       |       | minor |       | major | P-glycoprotein             | Training set |
| vincristine    | Merck                 |                           |       |       |       |       |       |       |       |       | major | P-glycoprotein             | Training set |
| vinorelbine    | Merck                 |                           |       |       |       |       |       |       | minor |       | major |                            | Training set |
| voriconazole   | Merck                 |                           |       |       |       | major |       | major |       |       | minor |                            | Training set |
| zafirlukast    | Merck                 |                           |       |       |       | major |       |       |       |       |       |                            | Training set |
| ziprasidone    | Merck                 | minor                     |       |       |       |       |       |       |       |       | minor |                            | Training set |
| Almotriptan    | Merck                 |                           |       |       |       |       |       |       | minor |       | minor |                            | Test set     |
| Amitriptyline  | Merck                 | minor                     |       | minor |       | minor |       | minor | major |       | minor |                            | Test set     |
| Buprenorphine  | Merck                 |                           |       |       |       |       |       |       |       |       | major |                            | Test set     |
| Carbamazepine  | Merck                 |                           |       |       | minor |       |       |       |       |       | major |                            | Test set     |
| Carvedilol     | Merck                 | minor                     |       |       |       | major |       |       | major | minor | minor | P-glycoprotein             | Test set     |
| Cetirizine     | Merck                 |                           |       |       |       |       |       |       |       |       | minor | P-glycoprotein             | Test set     |
| Chloroquine    | Merck                 |                           |       |       |       |       |       |       | major |       | major |                            | Test set     |
| Chlorpromazine | Merck                 | minor                     |       |       |       |       |       |       | major |       | minor |                            | Test set     |
| Colchicine     | Merck                 |                           |       |       |       |       |       |       |       |       | major | P-glycoprotein             | Test set     |
| Cortisol       | Merck                 |                           |       |       |       |       |       |       |       |       | minor | P-glycoprotein             | Test set     |
| Daunorubicin   | Merck                 |                           |       |       |       |       |       |       |       |       |       | P-glycoprotein             | Test set     |
| Desloratadine  | Merck                 |                           |       |       |       |       |       |       |       |       |       | P-glycoprotein             | Test set     |
| Dexamethasone  | Merck                 |                           |       |       |       |       |       |       |       |       | major | P-glycoprotein             | Test set     |
| Digoxin        | Merck                 |                           |       |       |       |       |       |       |       |       | minor | P-glycoprotein             | Test set     |
| Domperidone    | Merck                 |                           |       |       |       |       |       |       |       |       | minor |                            | Test set     |
| Eplerenone     | Merck                 |                           |       |       |       |       |       |       |       |       | major |                            | Test set     |
| Fluphenazine   | Merck                 |                           |       |       |       |       |       |       | major |       |       |                            | Test set     |
| Flutamide      | Merck                 | major                     |       |       |       |       |       |       |       |       | major |                            | Test set     |
| Gemfibrozil    | Merck                 |                           |       |       |       |       |       |       |       |       | minor |                            | Test set     |

| Drug Name        | Source | Substrate of CYP isoform- |      |       |       |       |       |       |       |       |       | Substrate of other protein      | Group    |
|------------------|--------|---------------------------|------|-------|-------|-------|-------|-------|-------|-------|-------|---------------------------------|----------|
|                  |        | -1A2                      | -2A6 | -2B6  | -2C8  | -2C9  | -2C18 | -2C19 | -2D6  | -2E1  | -3A4  |                                 |          |
| Glipizide        | Merck  |                           |      |       |       | major |       |       |       |       |       |                                 | Test set |
| Irinotecan       | Merck  |                           |      | major |       |       |       |       |       |       | major | P-glycoprotein, SLCO1B1, UGT1A1 | Test set |
| Lopinavir        | Merck  |                           |      |       |       |       |       |       |       |       | major |                                 | Test set |
| Metoclopramide   | Merck  | minor                     |      |       |       |       |       |       | minor |       |       |                                 | Test set |
| Metyrapone       | Merck  |                           |      |       |       |       |       |       |       |       |       |                                 | Test set |
| Nimodipine       | Merck  |                           |      |       |       |       |       |       |       |       | major |                                 | Test set |
| Paclitaxel       | Merck  |                           |      |       | major |       |       |       |       |       | major | P-glycoprotein                  | Test set |
| Pantoprazole     | Merck  |                           |      |       |       | minor |       | major | minor |       | minor |                                 | Test set |
| Perphenazine     | Merck  | minor                     |      |       |       | minor |       | minor | major |       | minor |                                 | Test set |
| Pioglitazone     | Merck  |                           |      |       | major |       |       |       |       |       | minor |                                 | Test set |
| Piroxicam        | Merck  |                           |      |       |       | minor |       |       |       |       |       |                                 | Test set |
| Prednisone       | Merck  |                           |      |       |       |       |       |       |       |       | minor |                                 | Test set |
| Ranitidine       | Merck  | minor                     |      |       |       |       |       | minor | minor |       |       | P-glycoprotein                  | Test set |
| Reserpine        | Merck  |                           |      |       |       |       |       |       |       |       |       |                                 | Test set |
| Rosiglitazone    | Merck  |                           |      |       | major | minor |       |       |       |       |       |                                 | Test set |
| Simvastatin      | Merck  |                           |      |       |       |       |       |       |       |       | major | SLCO1B1                         | Test set |
| Sulfamethoxazole | Merck  |                           |      |       |       | major |       |       |       |       | minor |                                 | Test set |
| Theophylline     | Merck  | major                     |      |       |       | minor |       |       | minor | major | major |                                 | Test set |
| Tioconazole      | Merck  |                           |      |       |       |       |       |       |       |       |       |                                 | Test set |
| Trimethoprim     | Merck  |                           |      |       |       | major |       |       |       |       | major |                                 | Test set |
| Zileuton         | Merck  | minor                     |      |       |       | minor |       |       |       |       | minor |                                 | Test set |
| Zolpidem         | Merck  | minor                     |      |       |       | minor |       | minor | minor |       | major |                                 | Test set |

<sup>1</sup> [http://greenrxpharmacy.com/drug\\_information\\_contents.aspx?PN=Amprenavir](http://greenrxpharmacy.com/drug_information_contents.aspx?PN=Amprenavir)

<sup>2</sup> [http://journals.lww.com/aidsonline/fulltext/2009/02200/pharmacology\\_of\\_second\\_line\\_antituberculosis\\_drugs.1.aspx](http://journals.lww.com/aidsonline/fulltext/2009/02200/pharmacology_of_second_line_antituberculosis_drugs.1.aspx)

<sup>3</sup> <http://www.mybwmc.org/library/41/041355>

<sup>4</sup> <http://www.hivmedicine.com/pdf/interact.pdf>; Tseng A. [www.tthivclinic.com](http://www.tthivclinic.com), General Hospital, Toronto, 2004.

<sup>5</sup> [http://www.p.kanazawa-u.ac.jp/~taisha/ejcp2000\\_843.pdf](http://www.p.kanazawa-u.ac.jp/~taisha/ejcp2000_843.pdf)

<sup>6</sup> <http://www.fda.gov/drugs/developmentapprovalprocess/developmentresources/druginteractionslabeling/ucm093664.htm#classInhibit>

<sup>7</sup> [http://greenrxpharmacy.com/drug\\_information\\_contents.aspx?PN=Propofol](http://greenrxpharmacy.com/drug_information_contents.aspx?PN=Propofol)

<sup>8</sup> [http://www.spine.org/Documents/fentora\\_9-13-07.pdf](http://www.spine.org/Documents/fentora_9-13-07.pdf)

Note: Most of the data were collected from The Merck Manual for Healthcare Professionals (<http://www.merckmanuals.com/professional/index.html>) as provided by Lexi-comp (<http://lexi-comp.com/>). 79 out 120 testing-set compounds were not included in the table because the information was not available. Information in the database is subject to change because it is based on clinical data that are continuously refined and updated. This table represents a snapshot of the database as of 2010.
